# Supplementary material for: Climate changes during the Late Glacial in southern Europe: new insights based on pollen and brGDGTs of Lake Matese in Italy
Source: Copernicus journal article supplement (doi:10.5194/cp-19-493-2023), 2023-02-23
Supplement: Supplementary file 1 [file cp-19-493-2023-supplement.zip]

Archive with 4 entries (4 files):
- Supplementary Table S2.xlsx
- Supplementary Table S1.pdf
- cp-19-493-2023-supplement-title-page.pdf
- Supplementary Table S3.xlsx
