# Supplementary material for: Climate changes during the Late Glacial in southern Europe: new insights based on pollen and brGDGTs of Lake Matese in Italy
Source: Copernicus journal article supplement (doi:10.5194/cp-19-493-2023), 2023-02-23
Supplement: Supplementary file 1 [file cp-19-493-2023-supplement.zip › cp-19-493-2023-supplement-title-page.pdf]

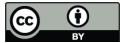

*Supplement of*

**Climate changes during the Late Glacial in southern Europe: new insights based on pollen and brGDGTs of Lake Matese in Italy**

**Mary Robles et al.**

*Correspondence to:* Mary Robles (robles@cerege.fr) and Odile Peyron (odile.peyron@umontpellier.fr)

- cp-19-493-2023-supplement-title-page.pdf
- Supplementary Table S1.pdf
- Supplementary Table S2.xlsx
- Supplementary Table S3.xlsx

The copyright of individual parts of the supplement might differ from the article licence.
