# Supplementary material for: Climate changes during the Late Glacial in southern Europe: new insights based on pollen and brGDGTs of Lake Matese in Italy
Source: Copernicus journal article supplement (doi:10.5194/cp-19-493-2023), 2023-02-23
Supplement: Supplementary file 1 [file cp-19-493-2023-supplement.zip › Supplementary Table S3.xlsx]

## Sheet: Matese tephra
Climate changes during the Late Glacial in southern Europe: new insights based on pollen and brGDGTs of Lake Matese in Italy
Mary Robles, Odile Peyron, Guillemette Ménot, Elisabetta Brugiapaglia, Sabine Wulf, Oona Appelt, Marion Blache, Boris Vannière, Lucas Dugerdil, Bruno Paura, Salomé Ansanay-Alex, Amy Cromartie, Laurent Charlet, Stephane Guédron, Jacques-Louis de Beaulieu, and Sébastien Joannin
Supplementary Table S3. Tephra glass data from the Lake Matese (Italy)
Instrument:	JEOL-JXA8230, GFZ Potsdam
Voltage:	15 kV
Beam current:	10 nA
Beam size:	15 microns
Sample name	Depth (cm)	Date	Correlative	Raw data													Normalised (voltile-free data)
				SiO2	TiO2	Al2O3	FeO	MnO	MgO	CaO	Na2O	K2O	P2O5	Cl	Total		SiO2 norm	TiO2 norm	Al2O3 norm	FeO norm	MnO norm	MgO norm	CaO norm	Na2O norm	K2O norm	P2O5 norm
MATSAL C1 96-97	346	2022-01-31	TM-6-2 (CF)	57.83	0.54	18.14	3.71	0.14	0.71	2.53	3.91	8.64	0.19	0.65	96.98		60.027	0.560515	18.8291	3.85094	0.145319	0.736973	2.62612	4.05854	8.96824	0.197218
MATSAL C1 96-97	346	2022-01-31	TM-6-2 (CF)	58.63	0.39	18.02	3.87	0.13	0.78	2.59	4.16	9.03	0.09	0.68	98.36		60.0164	0.399222	18.4461	3.96151	0.133074	0.798444	2.65124	4.25837	9.24353	0.0921282
MATSAL C1 96-97	346	2022-01-31	TM-6-2 (CF)	57.94	0.5	18.33	3.43	0.12	0.58	2.27	4.17	9.04	0.12	0.72	97.22		60.0415	0.518135	18.9948	3.5544	0.124352	0.601036	2.35233	4.32124	9.36788	0.124352
MATSAL C1 96-97	346	2022-01-31	TM-6-2 (CF)	59.32	0.47	18.16	3.37	0.19	0.6	2.21	4.35	8.55	0.1	0.74	98.06		60.9536	0.482943	18.6601	3.4628	0.195232	0.616523	2.27086	4.46979	8.78545	0.102754
MATSAL C1 96-97	346	2022-01-31	TM-6-2 (CF)	58.33	0.44	18.09	3.42	0.14	0.62	2.37	4.19	8.78	0.08	0.6	97.06		60.4707	0.456148	18.7539	3.54551	0.145138	0.642753	2.45698	4.34377	9.10222	0.0829359
MATSAL C1 96-97	346	2022-01-31	TM-6-2 (CF)	59.51	0.48	18.34	3.68	0.08	0.75	2.56	4.06	8.24	0.16	0.6	98.46		60.8114	0.490497	18.7411	3.76047	0.0817494	0.766401	2.61598	4.14878	8.42019	0.163499
MATSAL C1 96-97	346	2022-01-31	TM-6-2 (CF)	58.71	0.47	18.07	3.64	0.13	0.72	2.54	4.1	8.94	0.13	0.64	98.09		60.2463	0.482299	18.5428	3.73525	0.133402	0.73884	2.60646	4.20729	9.17394	0.133402
MATSAL C1 96-97	346	2022-01-31	TM-6-2 (CF)	58.87	0.49	18.17	3.69	0.11	0.78	2.47	3.86	9.06	0.17	0.61	98.28		60.2744	0.501689	18.6035	3.77803	0.112624	0.798608	2.52892	3.95208	9.27613	0.174055
MATSAL C1 96-97	346	2022-01-31	TM-6-2 (CF)	58.71	0.46	18.25	3.75	0.12	0.78	2.64	3.85	8.88	0.18	0.61	98.24		60.1414	0.471215	18.6949	3.84143	0.122926	0.799017	2.70436	3.94386	9.0965	0.184388
MATSAL C1 96-97	346	2022-01-31	TM-6-2 (CF)	59.55	0.45	17.99	3.66	0.16	0.76	2.48	3.85	8.75	0.19	0.6	98.44		60.8647	0.459935	18.3872	3.7408	0.163532	0.776778	2.53475	3.935	8.94317	0.194195
MATSAL C1 96-97	346	2022-01-31	TM-6-2 (CF)	58.2	0.49	17.91	3.95	0.15	0.91	2.82	3.99	8.21	0.2	0.53	97.35		60.1053	0.506042	18.4963	4.07931	0.154911	0.939791	2.91232	4.12062	8.47878	0.206548
MATSAL C1 96-97	346	2022-01-31	TM-6-2 (CF)	59.22	0.48	18.44	3.67	0.15	0.76	2.49	3.88	9	0.15	0.61	98.86		60.2809	0.488599	18.7704	3.73575	0.152687	0.773616	2.53461	3.94951	9.16124	0.152687
MATSAL C1 96-97	346	2022-01-31	TM-6-2 (CF)	58.49	0.47	17.95	3.38	0.13	0.59	2.29	4.06	8.8	0.06	0.77	97		60.7878	0.488464	18.6552	3.51278	0.135107	0.613178	2.37996	4.2195	9.14571	0.0623571
MATSAL C1 96-97	346	2022-01-31	TM-6-2 (CF)	59.41	0.5	18.1	3.76	0.12	0.8	2.64	3.81	8.89	0.16	0.61	98.8		60.5051	0.509217	18.4336	3.82931	0.122212	0.814747	2.68866	3.88023	9.05388	0.162949
MATSAL C1 96-97	346	2022-01-31	TM-6-2 (CF)	58.8	0.46	18.25	3.68	0.13	0.66	2.53	4.34	8.45	0.1	0.61	98.01		60.3696	0.472279	18.7372	3.77823	0.13347	0.677618	2.59754	4.45585	8.67556	0.102669
MATSAL C1 96-97	346	2022-01-31	TM-6-2 (CF)	59.78	0.49	18.08	3.66	0.12	0.62	2.25	4.3	8.51	0.13	0.76	98.69		61.0374	0.500306	18.4603	3.73698	0.122524	0.633041	2.29732	4.39044	8.68899	0.132734
MATSAL C1 96-97	346	2022-01-31	TM-6-2 (CF)	58.45	0.46	18.26	3.61	0.16	0.76	2.56	3.57	9.13	0.15	0.64	97.74		60.1895	0.47369	18.8034	3.71743	0.164762	0.782618	2.63619	3.67624	9.40171	0.154464
MATSAL C1 96-97	346	2022-01-31	TM-6-2 (CF)	59.68	0.5	18.31	3.69	0.16	0.76	2.6	4.07	8.91	0.17	0.64	99.49		60.3743	0.505817	18.523	3.73293	0.161861	0.768842	2.63025	4.11735	9.01366	0.171978
MATSAL C1 96-97	346	2022-01-31	TM-6-2 (CF)	58.44	0.44	17.93	3.37	0.15	0.66	2.42	3.62	8.76	0.1	0.63	96.53		60.9448	0.458859	18.6985	3.51444	0.156429	0.688289	2.52373	3.77516	9.13547	0.104286
MATSAL C1 96-97	346	2022-01-31	TM-6-2 (CF)	58.45	0.5	18.31	3.48	0.17	0.69	2.43	4.35	8.4	0.14	0.64	97.56		60.3075	0.515889	18.8919	3.59059	0.175402	0.711927	2.50722	4.48824	8.66694	0.144449
MATSAL C1 96-97	346	2022-01-31	TM-6-2 (CF)	59.59	0.45	18.73	3.07	0.11	0.63	2.48	3.53	9.13	0.15	0.52	98.39		60.8869	0.459794	19.1376	3.13681	0.112394	0.643711	2.53397	3.60683	9.3287	0.153265
MATSAL C1 96-97	346	2022-01-31	TM-6-2 (CF)	58.75	0.5	18.57	3.51	0.15	0.63	2.43	4.47	8.8	0.13	0.72	98.66		59.9857	0.510517	18.9606	3.58383	0.153155	0.643251	2.48111	4.56402	8.98509	0.132734
MATSAL C1 96-97	346	2022-01-31	TM-6-2 (CF)	58.83	0.47	18.21	3.66	0.13	0.76	2.45	3.67	9.22	0.19	0.63	98.22		60.2828	0.481607	18.6597	3.75038	0.13321	0.778768	2.5105	3.76063	9.44769	0.194692
MATSAL C1 96-97	346	2022-01-31	TM-6-2 (CF)	58.61	0.49	18.35	3.75	0.12	0.79	2.61	4.36	7.97	0.15	0.63	97.83		60.2984	0.504115	18.8786	3.85802	0.123457	0.812757	2.68519	4.4856	8.19959	0.154321
MATSAL C1 96-97	346	2022-01-31	TM-6-2 (CF)	59.34	0.49	18.58	3.52	0.14	0.75	2.53	4.42	8.55	0.13	0.62	99.06		60.2743	0.497715	18.8725	3.57542	0.142204	0.761808	2.56983	4.48959	8.68461	0.132047
MATSAL C1 96-97	346	2022-01-31	TM-6-2 (CF)	58.29	0.5	18.11	3.72	0.17	0.76	2.57	4.07	9.01	0.16	0.64	98		59.8706	0.513558	18.6011	3.82087	0.17461	0.780608	2.63969	4.18036	9.25431	0.164339
MATSAL C1 96-97	346	2022-01-31	TM-6-2 (CF)	59.38	0.45	18.12	3.45	0.14	0.74	2.61	3.77	8.82	0.12	0.65	98.24		60.8402	0.461066	18.5656	3.53484	0.143443	0.758197	2.67418	3.8627	9.03689	0.122951
MATSAL C1 96-97	346	2022-01-31	TM-6-2 (CF)	58.55	0.5	18.42	3.5	0.18	0.62	2.4	4.15	8.99	0.14	0.76	98.21		60.0821	0.513084	18.902	3.59159	0.18471	0.636224	2.4628	4.25859	9.22524	0.143663
MATSAL C3 83-84	510	2022-01-31	NYT/TM-8 (CF)	59.67	0.36	17.94	2.82	0.18	0.46	2.14	3.96	8.73	0.07	0.62	96.95		60.0821	0.513084	18.902	3.59159	0.18471	0.636224	2.4628	4.25859	9.22524	0.143663
MATSAL C3 83-84	510	2022-01-31	NYT/TM-8 (CF)	55.38	0.57	18.33	5.06	0.12	1.44	4.17	2.72	8.72	0.33	0.45	97.29		60.0821	0.513084	18.902	3.59159	0.18471	0.636224	2.4628	4.25859	9.22524	0.143663
MATSAL C3 83-84	510	2022-01-31	NYT/TM-8 (CF)	60.51	0.43	18.24	2.96	0.16	0.46	2.1	4.12	8.79	0.09	0.63	98.49		60.0821	0.513084	18.902	3.59159	0.18471	0.636224	2.4628	4.25859	9.22524	0.143663
MATSAL C3 83-84	510	2022-01-31	NYT/TM-8 (CF)	54.42	0.61	17.94	5.75	0.14	1.86	4.94	2.83	7.99	0.41	0.5	97.39		60.0821	0.513084	18.902	3.59159	0.18471	0.636224	2.4628	4.25859	9.22524	0.143663
MATSAL C3 83-84	510	2022-01-31	NYT/TM-8 (CF)	59.57	0.39	18.17	2.93	0.13	0.5	2.22	4.18	8.78	0.06	0.62	97.55		60.0821	0.513084	18.902	3.59159	0.18471	0.636224	2.4628	4.25859	9.22524	0.143663
MATSAL C3 83-84	510	2022-01-31	NYT/TM-8 (CF)	59.35	0.38	18.25	3.32	0.13	0.6	2.62	4.07	8.67	0.12	0.62	98.14		60.0821	0.513084	18.902	3.59159	0.18471	0.636224	2.4628	4.25859	9.22524	0.143663
MATSAL C3 83-84	510	2022-01-31	NYT/TM-8 (CF)	58.04	0.53	18.47	4.34	0.15	1.14	3.63	3.57	8.31	0.26	0.53	98.97		60.0821	0.513084	18.902	3.59159	0.18471	0.636224	2.4628	4.25859	9.22524	0.143663
MATSAL C3 83-84	510	2022-01-31	NYT/TM-8 (CF)	58.53	0.48	18.34	3.5	0.14	0.65	2.49	3.89	9.11	0.12	0.52	97.78		60.0821	0.513084	18.902	3.59159	0.18471	0.636224	2.4628	4.25859	9.22524	0.143663
MATSAL C3 83-84	510	2022-01-31	NYT/TM-8 (CF)	59.38	0.44	18.1	3.06	0.11	0.43	2.21	4.26	8.67	0.11	0.64	97.41		60.0821	0.513084	18.902	3.59159	0.18471	0.636224	2.4628	4.25859	9.22524	0.143663
MATSAL C3 83-84	510	2022-01-31	NYT/TM-8 (CF)	57.91	0.4	17.61	3	0.16	0.57	2.3	3.79	8.41	0.17	0.65	94.98		60.0821	0.513084	18.902	3.59159	0.18471	0.636224	2.4628	4.25859	9.22524	0.143663
MATSAL C3 83-84	510	2022-01-31	NYT/TM-8 (CF)	60.46	0.37	17.59	2.85	0.11	0.42	1.98	3.7	8.46	0.11	0.63	96.69		60.0821	0.513084	18.902	3.59159	0.18471	0.636224	2.4628	4.25859	9.22524	0.143663
MATSAL C3 83-84	510	2022-01-31	NYT/TM-8 (CF)	58.3	0.43	18.09	3.93	0.11	0.9	3.02	3.31	8.97	0.23	0.51	97.81		60.0821	0.513084	18.902	3.59159	0.18471	0.636224	2.4628	4.25859	9.22524	0.143663
MATSAL C3 83-84	510	2022-01-31	NYT/TM-8 (CF)	57.73	0.44	18.15	3.67	0.1	0.88	2.94	2.88	9.25	0.17	0.48	96.69		60.0821	0.513084	18.902	3.59159	0.18471	0.636224	2.4628	4.25859	9.22524	0.143663
MATSAL C3 83-84	510	2022-01-31	NYT/TM-8 (CF)	62.18	0.29	18.72	2.18	0.09	0.3	2.25	3.61	9.15	0.11	0.46	99.34		60.0821	0.513084	18.902	3.59159	0.18471	0.636224	2.4628	4.25859	9.22524	0.143663
MATSAL C3 83-84	510	2022-01-31	NYT/TM-8 (CF)	58.85	0.45	17.65	2.89	0.15	0.46	2.15	4.27	8.24	0.05	0.65	95.8		60.0821	0.513084	18.902	3.59159	0.18471	0.636224	2.4628	4.25859	9.22524	0.143663
MATSAL C3 83-84	510	2022-01-31	NYT/TM-8 (CF)	55.69	0.62	18.17	5.25	0.14	1.63	4.45	3	8.24	0.32	0.49	98		60.0821	0.513084	18.902	3.59159	0.18471	0.636224	2.4628	4.25859	9.22524	0.143663
MATSAL C3 83-84	510	2022-01-31	NYT/TM-8 (CF)	59.05	0.39	17.57	2.87	0.11	0.46	2.13	3.89	8.64	0.12	0.63	95.86		60.0821	0.513084	18.902	3.59159	0.18471	0.636224	2.4628	4.25859	9.22524	0.143663
MATSAL C3 83-84	510	2022-01-31	NYT/TM-8 (CF)	59.42	0.46	18.15	3.75	0.12	0.78	2.9	3.38	9.24	0.17	0.47	98.83		60.0821	0.513084	18.902	3.59159	0.18471	0.636224	2.4628	4.25859	9.22524	0.143663
MATSAL C3 83-84	510	2022-01-31	NYT/TM-8 (CF)	54.25	0.66	18.06	5.62	0.14	1.82	5.13	2.99	7.76	0.46	0.49	97.38		60.0821	0.513084	18.902	3.59159	0.18471	0.636224	2.4628	4.25859	9.22524	0.143663
MATSAL C3 83-84	510	2022-01-31	NYT/TM-8 (CF)	60.92	0.44	18.27	3	0.18	0.49	2.16	4.31	8.7	0.07	0.64	99.17		60.0821	0.513084	18.902	3.59159	0.18471	0.636224	2.4628	4.25859	9.22524	0.143663
MATSAL C3 83-84	510	2022-01-31	NYT/TM-8 (CF)	59.65	0.47	18.22	2.89	0.11	0.44	2.2	4.32	8.9	0.06	0.67	97.94		60.0821	0.513084	18.902	3.59159	0.18471	0.636224	2.4628	4.25859	9.22524	0.143663
MATSAL C3 83-84	510	2022-01-31	NYT/TM-8 (CF)	59.8	0.43	18.1	2.84	0.16	0.46	2.13	3.95	8.4	0.12	0.66	97.05		60.0821	0.513084	18.902	3.59159	0.18471	0.636224	2.4628	4.25859	9.22524	0.143663
MATSAL C3 83-84	510	2022-01-31	NYT/TM-8 (CF)	60.01	0.46	18.14	2.98	0.16	0.47	2.19	4.15	8.92	0.05	0.66	98.19		60.0821	0.513084	18.902	3.59159	0.18471	0.636224	2.4628	4.25859	9.22524	0.143663
MATSAL C3 83-84	510	2022-01-31	NYT/TM-8 (CF)	55.25	0.66	18.42	5.53	0.11	1.57	4.84	3.11	8.13	0.39	0.48	98.49		60.0821	0.513084	18.902	3.59159	0.18471	0.636224	2.4628	4.25859	9.22524	0.143663
MATSAL C3 83-84	510	2022-01-31	NYT/TM-8 (CF)	56.91	0.44	18.04	3.52	0.16	0.74	2.73	3.77	8.44	0.18	0.59	95.51		60.0821	0.513084	18.902	3.59159	0.18471	0.636224	2.4628	4.25859	9.22524	0.143663
MATSAL C3 83-84	510	2022-01-31	NYT/TM-8 (CF)	58.45	0.41	17.59	2.81	0.16	0.45	2.03	3.96	8.37	0.1	0.66	94.99		60.0821	0.513084	18.902	3.59159	0.18471	0.636224	2.4628	4.25859	9.22524	0.143663

## Sheet: Glass standards
Glass standard	Date	SiO2	TiO2	Al2O3	FeO	MnO	MgO	CaO	Na2O	K2O	P2O5	Cl	Total
Lipari obsidian	2022-01-31	74.93	0.03	13.37	1.64	0.06	0.05	0.75	3.97	5.23	0.01	0.33	100.37
GOR-132-G	2022-01-31	45.71	0.28	10.98	10.33	0.15	22.31	8.37	0.77	0.04	0.05	0.01	98.99
StHs6/80-G	2022-01-31	63.66	0.72	18.01	4.54	0.07	1.93	5.28	4.23	1.38	0.2	0.02	100.05
ATHO-G	2022-01-31	75	0.27	12.34	3.45	0.11	0.11	1.67	3.98	2.59	0.02	0.05	99.58
