# Supplementary material for: Climate changes during the Late Glacial in southern Europe: new insights based on pollen and brGDGTs of Lake Matese in Italy
Source: Copernicus journal article supplement (doi:10.5194/cp-19-493-2023), 2023-02-23
Supplement: Supplementary file 1 [file Supplementary Table S2.xlsx]

## Sheet: Feuil1
Climate changes during the Late Glacial in southern Europe: new insights based on pollen and brGDGTs of Lake Matese in Italy
Mary Robles, Odile Peyron, Guillemette Ménot, Elisabetta Brugiapaglia, Sabine Wulf, Oona Appelt, Marion Blache, Boris Vannière, Lucas Dugerdil, Bruno Paura, Salomé Ansanay-Alex, Amy Cromartie, Laurent Charlet, Stephane Guédron, Jacques-Louis de Beaulieu, and Sébastien Joannin
Supplementary Table S2. Fractional abundances of brGDGTs and summed concentration of brGDGTs for each sample from the Lake Matese (Italy)
Sample name	Depth (cm)	Age cal BP	Fractional abundance (% of total)																						Concentration ΣbrGDGTs (µg/g sed)
			IIIa	IIIa'	IIIa7	IIIb	IIIb'	IIIb7	IIIc	IIIc'	IIIc7	IIa	IIa'	IIa7	IIb	IIb'	IIb7	IIc	IIc'	IIc'/IIc''	IIc7	Ia	Ib	Ic
MATSAL A4 38-39	338	11269	6.84762	2.33225	1.06128	0.288048	0.181295	0.118098	0.138039	0.0210861	0.0221489	16.876	10.872	2.12697	4.77004	0.707564	0.687055	2.03805	0.0640377	0.07417	0.0347967	40.5837	7.46146	2.69436	0.93101
MATSAL A4 42-43	342	11352	5.59158	2.01772	0.911809	0.273407	0.223069	0.216025	0.111036	0	0	17.2595	10.1561	2.4833	5.28697	0.631882	0.697914	1.98394	0.0707843	0.0790378	0.0626559	40.1225	8.69397	3.12679	0.794157
MATSAL A4 46-47	346	11435	6.31242	2.26286	1.16676	0.333892	0.242328	0.11829	0.146122	0.0405554	0.0335246	18.5983	9.86683	2.05477	4.7053	0.929909	0.785383	2.10446	0.0688099	0.0696651	0.035951	38.5004	8.75903	2.86435	0.72072
MATSAL A4 50-51	350	11517	7.60443	2.9687	2.30631	0.466517	0.176471	0.389826	0.33624	0.0563668	0.0564782	22.1774	7.64141	3.02565	5.57428	1.02842	0.927021	2.84021	0.103333	0.0616037	0	30.8522	8.76096	2.64621	0.582215
MATSAL A4 54-55	354	11593	10.4357	3.26527	2.75795	0.751473	0.533039	0.199341	0.950068	0.0588352	0.0574668	25.717	4.96992	3.12438	6.71396	0.459298	2.12834	6.82871	0.160103	0.145925	0.0700118	19.6881	7.88107	3.10396	0.39835
MATSAL A4 58-59	358	11667	10.888	3.13638	2.77717	0.74875	0.452415	0.163482	0.839295	0.061867	0.0784025	23.7059	5.60515	2.98661	6.09494	0.685939	2.10322	6.81344	0.226777	0.157706	0.0764365	21.2257	7.97815	3.19426	0.246535
MATSAL A4 62-63	362	11742	8.18333	2.59634	2.28416	0.564365	0.411961	0.187685	0.70117	0.0511888	0.103423	19.341	4.28937	2.30715	5.05846	0.588636	3.27176	10.3282	0.418671	0.124319	0.0579216	29.0213	6.87558	3.23395	0.333351
MATSAL A4 66-67	366	11816	10.2971	3.192	2.85959	0.852555	0.498556	0.271127	0.774225	0.0541662	0.0589303	24.1343	5.45903	2.94854	5.8814	0.52182	2.1835	7.24746	0.192776	0.211802	0.136322	20.4227	8.44947	3.35272	0.293693
MATSAL A4 70-71	370	11890	7.85151	3.59879	2.58264	0.701529	0.517994	0.281709	0.767486	0.0501338	0.0684476	23.2912	5.39885	3.12285	5.8237	0.723849	2.16782	7.06468	0.379791	0.197457	0.0888322	21.0313	10.5141	3.77536	0.350909
MATSAL A4 74-75	374	11962	8.98445	3.18665	2.77628	0.716775	0.433955	0.223918	0.723526	0.0569839	0.0794809	26.8667	4.48358	3.62768	5.69068	0.651889	1.66332	5.44941	0.0250463	0.143461	0.0702289	20.688	9.98065	3.47737	0.246898
MATSAL A4 78-79	378	12036	8.16509	3.45073	2.34984	0.809121	0.547903	0.270841	0.805331	0.0632353	0.102241	23.4762	5.40888	3.78653	6.50586	0.545881	2.13952	7.31955	0.173342	0.168094	0.0592931	19.9375	10.0777	3.83729	0.35357
MATSAL A4 82-83	382	12110	7.75808	3.55219	2.45837	0.816434	0.579133	0.42693	0.674385	0.0635757	0.120126	23.2682	4.58397	3.58092	6.90789	0.563563	1.89442	5.70332	0.16934	0.208677	0.120592	20.5546	11.9191	4.07614	0.329601
MATSAL A4 86-87	386	12183	7.04155	4.11528	2.30621	0.776906	0.613304	0.311066	0.733682	0.0761922	0.101457	22.6577	6.5717	4.2987	7.25889	0.603212	2.30396	7.34795	0.459709	0.261387	0.148155	20.1387	8.25314	3.62116	0.347855
MATSAL A4 90-91	390	12257	9.89333	4.37891	2.20286	0.828124	0.570948	0.364987	0.709263	0.0845345	0.128568	24.5806	6.12047	4.09143	6.06295	0.88306	1.70968	5.68302	0.279761	0.220599	0.109642	20.3486	7.84154	2.90715	0.25465
MATSAL A4 94-95	394	12330	10.6093	4.5832	2.27534	0.878323	0.524861	0.281379	0.700437	0.0862535	0.107688	24.332	4.95245	4.37048	6.01	0.627983	1.59739	5.30633	0.122147	0.153474	0.0616548	21.5432	7.72836	3.14783	0.283202
MATSAL B4 48-49	398	12404	9.55519	5.06876	2.64023	0.927767	0.60457	0.250736	0.89476	0.213092	0.27727	24.6477	6.11732	4.52021	6.16571	0.785593	1.75155	5.24817	0.243789	0.199098	0.0790274	21.0114	7.99207	0.80593	0.195171
MATSAL B4 52-53	402	12477	8.36217	5.03398	2.70762	1.08402	0.76295	0.449877	0.845926	0.0800661	0.121849	24.3596	4.66617	4.61308	6.01568	0.770746	1.69371	5.36338	0.190498	0.158546	0.12498	20.9332	8.61132	3.05057	0.256669
MATSAL B4 56-57	406	12549	8.6277	5.01607	2.77946	0.883848	0.597292	0.307137	0.689935	0.061021	0.0928592	23.2763	7.19477	4.75521	6.45551	0.753776	1.43515	4.43636	0.195867	0.140423	0.139156	21.544	7.53533	3.08292	0.298358
MATSAL B4 60-61	410	12623	9.4099	4.99339	2.22567	0.87961	0.512014	0.29111	0.744386	0.0856944	0.115872	22.0272	5.91045	4.7608	6.90475	1.01716	1.59037	4.79728	0.0876844	0.0999856	0.098495	21.1838	8.66883	3.59553	0.317575
MATSAL A5 14-15	414	12696	9.63979	4.91853	2.51986	0.863509	0.687913	0.312345	0.530036	0.0957363	0.0794161	26.2586	5.98596	3.34782	5.62448	1.24116	1.12845	3.24218	0.0784631	0.10003	0.0675346	22.9406	7.9589	2.37864	0.195596
MATSAL A5 18-19	418	12770	9.01692	4.75233	1.92409	0.843964	0.498369	0.29413	0.596802	0.049061	0.0798383	22.9945	7.18274	3.83655	6.20964	0.978286	1.5278	4.39171	0.518463	0.104027	0.0893363	22.828	8.24184	3.04157	0.330468
MATSAL A5 22-23	422	12847	10.1172	4.84637	2.15701	0.834744	0.516998	0.26736	0.712016	0.0950605	0.105318	24.1291	7.04708	4.09232	6.28713	0.915038	1.2564	3.74926	0.0979539	0.100449	0.800429	20.3498	8.7584	2.76452	0.280793
MATSAL A5 26-27	426	12927	8.3525	4.69447	2.46549	0.885314	0.574005	0.377633	0.747132	0.0643548	0.100657	26.2048	5.66724	3.25566	6.71072	0.949997	1.58552	4.87134	0.147257	0.107364	0.103632	21.5598	7.90302	2.67217	0.505561
MATSAL A5 30-31	430	13007	9.84306	6.20964	2.99489	0.900685	0.55361	0.298332	0.618776	0.122467	0.152594	22.6438	8.30535	3.43	6.39266	1.21537	1.25527	3.52384	0.178566	0.123776	0.124356	20.6173	7.98141	2.51424	0.377485
MATSAL A5 34-35	434	13088	8.83427	5.5071	2.458	1.10023	0.731201	0.448282	0.751331	0.0930201	0.138089	23.9909	3.77589	3.87015	7.30339	1.25848	1.42939	4.30289	0.198701	0.0947242	0.16914	21.6278	9.02199	2.89497	0.566043
MATSAL A5 38-39	438	13168	10.5302	4.77229	1.96179	0.861419	0.512247	0.201448	0.769033	0.109741	0.11657	24.718	6.11284	3.45671	5.52773	1.00589	1.05663	3.01587	0.142044	0.0373174	0.0981211	23.7351	8.41243	2.8467	0.0839131
MATSAL A5 42-43	442	13248	10.1949	4.32425	1.77529	0.735482	0.467889	0.260394	0.49084	0.0922842	0.105098	27.7023	4.36433	3.0321	5.61422	1.18076	0.750473	2.03181	0.215569	0.0621273	0.153902	21.5008	10.4497	4.49553	0.172295
MATSAL A5 46-47	446	13328	10.9387	4.62616	1.7897	0.696888	0.477223	0.280902	0.336758	0.0572485	0.10084	26.7572	7.26594	3.10276	5.89396	1.50745	0.537765	1.57799	0.163153	0.0758398	0.114653	21.5856	9.74433	2.36891	0.194168
MATSAL A5 50-51	450	13408	9.11978	5.11332	1.75043	0.679445	0.592995	0.353507	0.25501	0.0772442	0.0717552	23.3023	7.81212	3.18726	5.83985	1.94421	0.623758	1.66283	0.19138	0.0474589	0.120812	22.9769	11.2879	2.98982	0.206648
MATSAL A5 54-55	454	13487	11.1846	4.7718	1.6073	0.561828	0.443623	0.255669	0.258257	0.108167	0.166003	25.2512	7.31058	3.27455	5.8953	1.75057	0.469292	1.21175	0.41655	0.0463795	0.113864	23.1481	9.46325	2.29136	0.0821047
MATSAL A5 58-59	458	13566	13.5725	5.44244	1.41315	0.481704	0.372351	0.220572	0.110875	0.0499361	0.0808024	24.6541	8.29608	3.24779	6.60625	2.12359	0.527639	0.783212	0.258998	0.0200866	0.117173	19.2938	10.2633	2.06359	0.286367
MATSAL A5 62-63	462	13645	14.0719	6.39473	1.90081	0.642043	0.577043	0.234071	0.210177	0.108603	0.108862	25.8755	7.65405	3.06539	6.41657	2.86752	0.437435	1.01258	0.195324	0.0431789	0.167794	16.5219	9.50411	1.99049	0.322298
MATSAL A5 66-67	466	13724	14.6807	6.53584	1.87852	0.524152	0.411937	0.16425	0.116883	0.0693487	0.0414986	26.8564	10.034	2.83981	6.4617	1.99998	0.283292	0.596905	0.183868	0.0537739	0.141427	16.0147	8.56592	1.54514	0.549232
MATSAL A5 70-71	470	13804	16.7715	7.50552	2.04022	0.663573	0.652005	0.243725	0.186959	0.126856	0.138538	26.0383	8.16268	3.69004	7.49979	2.36421	0.348658	0.754138	0.201687	0.0554028	0.186707	12.3835	8.11033	1.87561	0.0694702
MATSAL A5 74-75	474	13885	16.7924	7.61811	2.16329	0.593993	0.507515	0.274793	0.124935	0.0597191	0.0728151	24.2319	8.65367	3.22381	7.12497	2.75008	0.276559	0.772904	0.122068	0.0256083	0.142071	15.1185	7.58021	1.77009	0.205126
MATSAL A5 78-79	478	13955	19.8563	8.77919	1.76334	0.586856	0.731513	0.177032	0.0900531	0.0986747	0.0482208	24.8408	10.8623	2.48881	6.4167	2.96939	0.203406	0.35588	0.206819	0.020969	0.130059	11.5614	6.55842	1.25386	2.42946
MATSAL A5 82-83	482	14017	17.9299	9.12836	1.56916	0.774677	0.925398	0.330979	0.248737	0.203836	0.0949375	20.1508	9.18554	3.39409	8.55825	4.16253	0.399892	0.649515	0.521512	0.0781088	0.25377	10.3657	9.33424	1.74	8.63078
MATSAL B5 50-51	486	14076	26.2226	13.1964	2.496	1.4796	1.06472	0.304112	0.138002	0.090152	0.0494359	10.4043	5.6068	2.07259	5.02012	1.98652	0.402722	0.539147	0.198308	0.249703	0.43628	6.72734	18.3261	2.98897	0.469797
MATSAL B5 54-55	490	14136	10.7648	5.68912	2.32526	0.753285	0.703986	0.439131	0.261389	0.154564	0.11794	19.48	8.49684	4.19228	9.65141	3.96838	0.54349	1.32407	0.465705	0.118129	0.194589	15.6549	11.6144	3.08634	0.791446
MATSAL B5 58-59	494	14193	12.4177	6.26595	2.76218	0.881273	0.686266	0.415233	0.227901	0.121355	0.112144	20.018	6.88914	4.38345	9.95362	2.66497	0.588831	1.17628	0.270932	0.0673427	0.1445	16.0601	11.2485	2.64423	0.721123
MATSAL B5 62-63	498	14253	12.1617	7.45088	2.45646	0.774234	0.754595	0.561482	0.206658	0.108462	0.105838	19.9124	8.3217	3.76278	8.29018	2.75923	0.483317	1.19346	0.163302	0.0547669	0.222014	17.6362	10.528	2.09233	0.48517
MATSAL B5 66-67	502	14312	13.0329	9.761	2.63578	0.856589	0.60965	0.506594	0.255361	0.133376	0.147538	16.755	11.5787	3.73511	8.70145	2.048	0.483853	1.18672	0.16923	0.0315639	0.227818	15.8165	9.15502	2.17233	0.177919
MATSAL B5 70-71	506	14371	13.2709	11.3609	2.6917	0.996934	0.630248	0.562278	0.125058	0.0803226	0.0635144	16.2748	12.3195	3.56128	8.53648	2.81269	0.346408	0.726778	0.108433	0.0121973	0.193913	15.9859	7.58035	1.75925	0.45078
MATSAL B5 74-75	510	14430	13.5186	11.1601	2.66003	0.890916	0.705358	0.590939	0.146597	0.088022	0.0909078	16.3219	11.5678	3.18203	9.01436	1.88062	0.263839	0.735748	0.185305	0.0322503	0.166826	17.165	7.72317	1.90963	0.450079
MATSAL B5 78-79	514	14491	16.2283	15.4596	2.25927	1.20215	0.7067	0.57841	0.12841	0.101591	0.0406434	16.1006	11.3294	2.77993	7.29293	2.81087	0.245531	0.553124	0.101812	0.0114044	0.0382816	15.0395	5.98899	1.00258	0.999563
MATSAL B5 82-83	518	14550	10.9694	11.0014	1.4831	0.779771	0.947218	0.712098	0.0947084	0.178618	0.243916	10.3473	8.85171	1.91761	3.9902	3.12034	0.820837	1.04807	0.511665	0.0791156	0.391252	28.7712	12.8651	0.87539	0.691974
MATSAL B5 86-87	522	14620	16.9719	18.1757	2.15049	0.898855	0.904595	0.46753	0.1201	0.0856464	0.0347597	14.5903	13.2212	2.2632	5.02308	3.46808	0.210079	0.479264	0.102748	0.0141274	0.139915	13.9901	5.86431	0.823937	0.60305
MATSAL B5 90-91	526	14700	20.1635	9.62692	2.53476	1.02678	0.955223	0.556389	0.246562	0.111949	0.0870864	22.8284	6.64443	2.34595	6.38518	2.52602	0.293403	0.61599	0.137798	0.0142084	0.305541	13.1094	7.98725	1.4972	0.164841
MATSAL B5 94-95	530	14781	15.4467	4.9844	2.34509	0.532417	0.707499	0.252561	0.278391	0.0925882	0.0538644	46.974	3.52234	2.29352	3.98477	1.0457	0.176598	0.339629	0.0654431	0.013794	0.0596593	9.91915	6.09114	0.820726	0.254412
MATSAL B5 99-100	534	14881	23.3841	5.80689	2.12287	0.696975	0.519114	0.258365	0.202317	0.20877	0.0508804	28.0999	4.57905	2.42983	5.4629	1.58905	0.221772	0.466314	0.141946	0.0185276	0.0908068	13.8399	8.68437	1.12532	0.109958
